# Supplementary material for: The Potential for Dams to Impact Lowland Meandering River Floodplain Geomorphology
Source: Hindawi journal article supplement (doi:10.1155/2014/309673), 2014-01-01
Supplement: f1 [file 309673.f1.pdf]

| Dam Wall        | Dam State | River           | Purpose | Catchment Area km <sup>2</sup> | Capacity ML | Surface Area Km <sup>2</sup> | Height m | Dam Date |
|-----------------|-----------|-----------------|---------|--------------------------------|-------------|------------------------------|----------|----------|
| Menindee        | NSW       | Darling         | I S     | 575000                         | 1794000     | 45800                        | 18       | 1960     |
| Hume            | NSW       | Murray          | I H     | 15300                          | 3038000     | 20240                        | 51       | 1936     |
| Burrinjuck      | NSW       | Murrumbidgee    | I H     | 13000                          | 1026000     | 5500                         | 79       | 1956     |
| Warragamba      | NSW       | Warragamba      | S H     | 9000                           | 1886000     | 7495                         | 137      | 1960     |
| Wyangala        | NSW       | Lachlan         | I       | 8300                           | 1220000     | 5300                         | 85       | 1971     |
| Wyangala        | NSW       | Lachlan         | I       | 8300                           | 374860      | 0                            | 61       | 1935     |
| Wivenhoe        | QLD       | Brisbane        | SFRHH   | 7020                           | 1150000     | 10800                        | 59       | 1985     |
| Keepit          | NSW       | Namoi           | I H     | 5700                           | 423000      | 4375                         | 55       | 1960     |
| Copeton         | NSW       | Gwydir          | I S     | 5360                           | 1364000     | 4600                         | 113      | 1976     |
| Boondooma       | QLD       | Boyne           | S I P   | 4200                           | 212000      | 1920                         | 64       | 1983     |
| Eildon          | VIC       | Goulburn        | I H     | 3870                           | 3390000     | 13832                        | 79       | 1927     |
| Dartmouth       | VIC       | Mitta Mitta     | I H S   | 3611                           | 4057000     | 6300                         | 180      | 1979     |
| Wuruma          | QLD       | Nogo            | I       | 2320                           | 194000      | 1780                         | 46       | 1969     |
| Eppalock        | VIC       | Campaspe        | I S     | 2030                           | 312000      | 3230                         | 45       | 1962     |
| Pindari         | NSW       | Severn          | S.I     | 2000                           | 37500       | 316                          | 45       | 1969     |
| Glenmaggie      | VIC       | Macalister      | I       | 1890                           | 190000      | 1760                         | 37       | 1927     |
| Jindabyne       | NSW       | Snowy           | H       | 1850                           | 688287      | 3034                         | 72       | 1967     |
| Coolmunda       | QLD       | Macintyre       | I S     | 1760                           | 75200       | 1740                         | 20       | 1968     |
| Bjelke-Petersen | QLD       | Barker          | I       | 1670                           | 125000      | 2150                         | 43       | 1988     |
| Blowering       | NSW       | Tumut           | I H     | 1600                           | 1628000     | 4455                         | 112      | 1968     |
| Cairn Curran    | VIC       | Loddon          | I S     | 1590                           | 148000      | 1900                         | 44       | 1956     |
| Somerset        | QLD       | Stanley         | SFRH    | 1330                           | 369000      | 4350                         | 50       | 1959     |
| Fred Haigh      | QLD       | Kolan           | I S     | 1310                           | 586000      | 5340                         | 52       | 1975     |
| Glenbawn        | NSW       | Hunter          | I F S   | 1300                           | 750000      | 2700                         | 100      | 1987     |
| Glenbawn        | NSW       | Hunter          | I F S   | 1300                           | 360000      | 1700                         | 78       | 1958     |
| Glenlyon        | QLD       | Pike            | I S     | 1295                           | 254000      | 1800                         | 62       | 1976     |
| Teddington Wr   | QLD       | Tinana          | S       | 1190                           | 3880        | 140                          | 7        | 1933     |
| Talbingo        | NSW       | Tumut           | H       | 1090                           | 921400      | 1936                         | 162      | 1971     |
| Windemere       | NSW       | Cudgegong       | I R     | 1070                           | 368000      | 2030                         | 67       | 1983     |
| Buffalo         | VIC       | Buffalo         | I S     | 1062                           | 24000       | 341                          | 30       | 1965     |
| Googong         | NSW       | Queanbeyan      | S       | 873                            | 124500      | 680                          | 62       | 1977     |
| Tullaroop       | VIC       | Tullaroop       | I S     | 742                            | 74000       | 742                          | 24       | 1959     |
| Eucumbene       | NSW       | Eucumbene       | H       | 673                            | 4798400     | 14452                        | 116      | 1958     |
| Leslie          | QLD       | Sandy           | I S R   | 603                            | 47100       | 724                          | 30       | 1965     |
| Leslie          | QLD       | Sandy           | I S R   | 603                            | 108000      | 1260                         | 33       | 1986     |
| Tantangara      | NSW       | Murrumbidgee    | H       | 471                            | 254099      | 2118                         | 45       | 1960     |
| Borumba         | QLD       | Yabba           | I S     | 465                            | 42600       | 502                          | 53       | 1964     |
| Chaffey         | NSW       | Peel            | I S     | 420                            | 61800       | 542                          | 54       | 1979     |
| Brogo           | NSW       | Brogo           | I       | 396                            | 9000        | 102                          | 43       | 1976     |
| Nillahcootie    | VIC       | Broken          | S I     | 389                            | 40000       | 532                          | 35       | 1967     |
| Mount Bold      | SA        | Onkaparinga     | S       | 388                            | 45900       | 308                          | 56       | 1963     |
| Mount Bold      | SA        | Onkaparinga     | S       | 388                            | 30200       | 0                            | 0        | 1937     |
| North Pine      | QLD       | North Pine      | S R     | 347                            | 202000      | 2150                         | 44       | 1976     |
| Upper Yarra     | VIC       | Yarra           | S       | 337                            | 207200      | 750                          | 89       | 1957     |
| Blue Rock       | VIC       | Tanjil          | S       | 337                            | 200000      | 873                          | 75       | 1984     |
| Tumut           | NSW       | Tumut           | H       | 332                            | 52793       | 203                          | 86       | 1958     |
| Cressbrook      | QLD       | Cressbrook Cr   | S       | 325                            | 83000       | 530                          | 63       | 1983     |
| Nepean          | NSW       | Nepean          | S       | 320                            | 45930       | 357                          | 81       | 1935     |
| Malmsbury       | VIC       | Coliban         | I S     | 290                            | 18000       | 301                          | 24       | 1870     |
| Cania           | QLD       | Three Moon Cr   | I A     | 280                            | 89000       | 720                          | 54       | 1982     |
| Lostock         | NSW       | Paterson        | I       | 280                            | 20000       | 220                          | 38       | 1971     |
| Glennies Creek  | NSW       | Glennies Creek  | I S     | 233                            | 283000      | 1540                         | 67       | 1983     |
| Carcoar         | NSW       | Belubula        | I       | 230                            | 35800       | 385                          | 58       | 1970     |
| South Para      | SA        | South Para      | S       | 228                            | 51190       | 444                          | 48       | 1960     |
| South Para      | SA        | South Para      | S       | 228                            | 44900       | 0                            | 0        | 1958     |
| Moogerah        | QLD       | Reynolds        | I S P   | 225                            | 92500       | 878                          | 40       | 1961     |
| Lauriston       | VIC       | Coliban         | I S     | 223                            | 20000       | 208                          | 33       | 1941     |
| Hinze           | QLD       | Nerang          | S       | 209                            | 165000      | 972                          | 62       | 1989     |
| Hinze           | QLD       | Nerang          | S       | 209                            | 41820       | 486                          | 44       | 1976     |
| Corin           | NSW       | Cotter          | S       | 197                            | 74970       | 320                          | 76       | 1968     |
| Chichester      | NSW       | Chichester      | S       | 197                            | 17740       | 152                          | 41       | 1923     |
| Cooby Creek     | QLD       | Cooby Creek     | S       | 184                            | 20900       | 301                          | 31       | 1942     |
| Moondarra       | VIC       | Tyers           | S       | 172                            | 30400       | 243                          | 41       | 1962     |
| Pejar           | NSW       | Wollondilly     | S       | 166                            | 9000        | 140                          | 26       | 1979     |
| Tooma           | NSW       | Tooma           | H       | 153                            | 28124       | 0                            | 67       | 1961     |
| Avon            | NSW       | Avon            | S       | 141                            | 146700      | 1056                         | 72       | 1935     |
| Cataract        | NSW       | Cataract        | S       | 130                            | 94300       | 851                          | 59       | 1907     |
| Thomson         | VIC       | Thomson         | S I     | 126                            | 1123000     | 220                          | 166      | 1985     |
| Toolondo        | VIC       | Mt Talbot Creek | I S     | 126                            | 106500      | 0                            | 6        | 1954     |
| Connolly        | QLD       | Rosenthal Cr    | S I     | 124                            | 2590        | 55                           | 22       | 1927     |

|              |     |              |   |     |        |     |    |      |
|--------------|-----|--------------|---|-----|--------|-----|----|------|
| Myponga      | SA  | Myponga      | S | 124 | 27130  | 280 | 50 | 1962 |
| Moora Moora  | VIC | Castle       | S | 124 | 6300   | 0   | 2  | 1934 |
| Warren       | SA  | South Parra  | S | 119 | 4770   | 105 | 26 | 1916 |
| Perseverance | QLD | Perseverance | S | 117 | 30900  | 220 | 53 | 1965 |
| Tarago       | VIC | Tarago       | S | 109 | 37500  | 359 | 34 | 1968 |
| Maroon       | QLD | Burnett      | I | 106 | 38400  | 326 | 52 | 1974 |
| Maroondah    | VIC | Watts        | S | 104 | 28370  | 197 | 41 | 1927 |
| Mangrove Cr  | NSW | Mangrove Cr  | S | 104 | 170000 | 700 | 80 | 1982 |
| Ginninderra  | NSW | Ginninderra  | R | 100 | 3700   | 105 | 17 | 1975 |
